# Supplementary material for: Pharmacy Accessibility and Social Vulnerability
Source: PubMed Central journal article supplement (PMC11344234; doi:10.1001/jamanetworkopen.2024.29755), 2024-08-23
Supplement: jamanetwopen-e2429755-s001.pdf [file jamanetwopen-e2429755-s001.pdf]

## Data Sharing Statement

Catalano. Pharmacy Accessibility and Social Vulnerability. *JAMA Netw Open*. Published August 23, 2024. doi:10.1001/jamanetworkopen.2024.29755

### Data

**Data available:** No
